# Supplementary material for: Structural Mechanism for Modulation of Synaptic Neuroligin-Neurexin Signaling by MDGA Proteins
Source: PubMed Central journal article supplement (PMC5563082; doi:10.1016/j.neuron.2017.07.040), 2017-08-16
Supplement: mmc1.pdf [file mmc1.pdf]

**Neuron, Volume 95**

**Supplemental Information**

**Structural Mechanism for Modulation of Synaptic**

**Neuroigin-Neurexin Signaling by MDGA Proteins**

**Jonathan Elegheert, Vedrana Cvetkovska, Amber J. Clayton, Christina Heroven, Kristel M. Vennekens, Samuel N. Smukowski, Michael C. Regan, Wanyi Jia, Alexandra C. Smith, Hiro Furukawa, Jeffrey N. Savas, Joris de Wit, Jo Begbie, Ann Marie Craig, and A. Radu Aricescu**

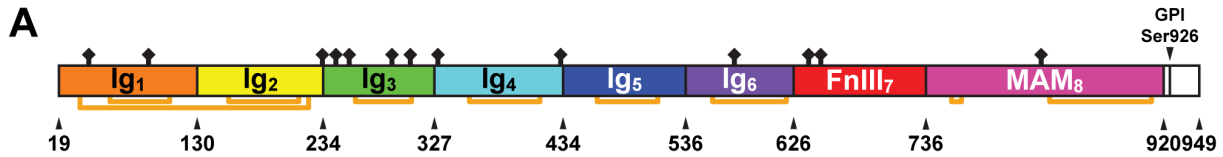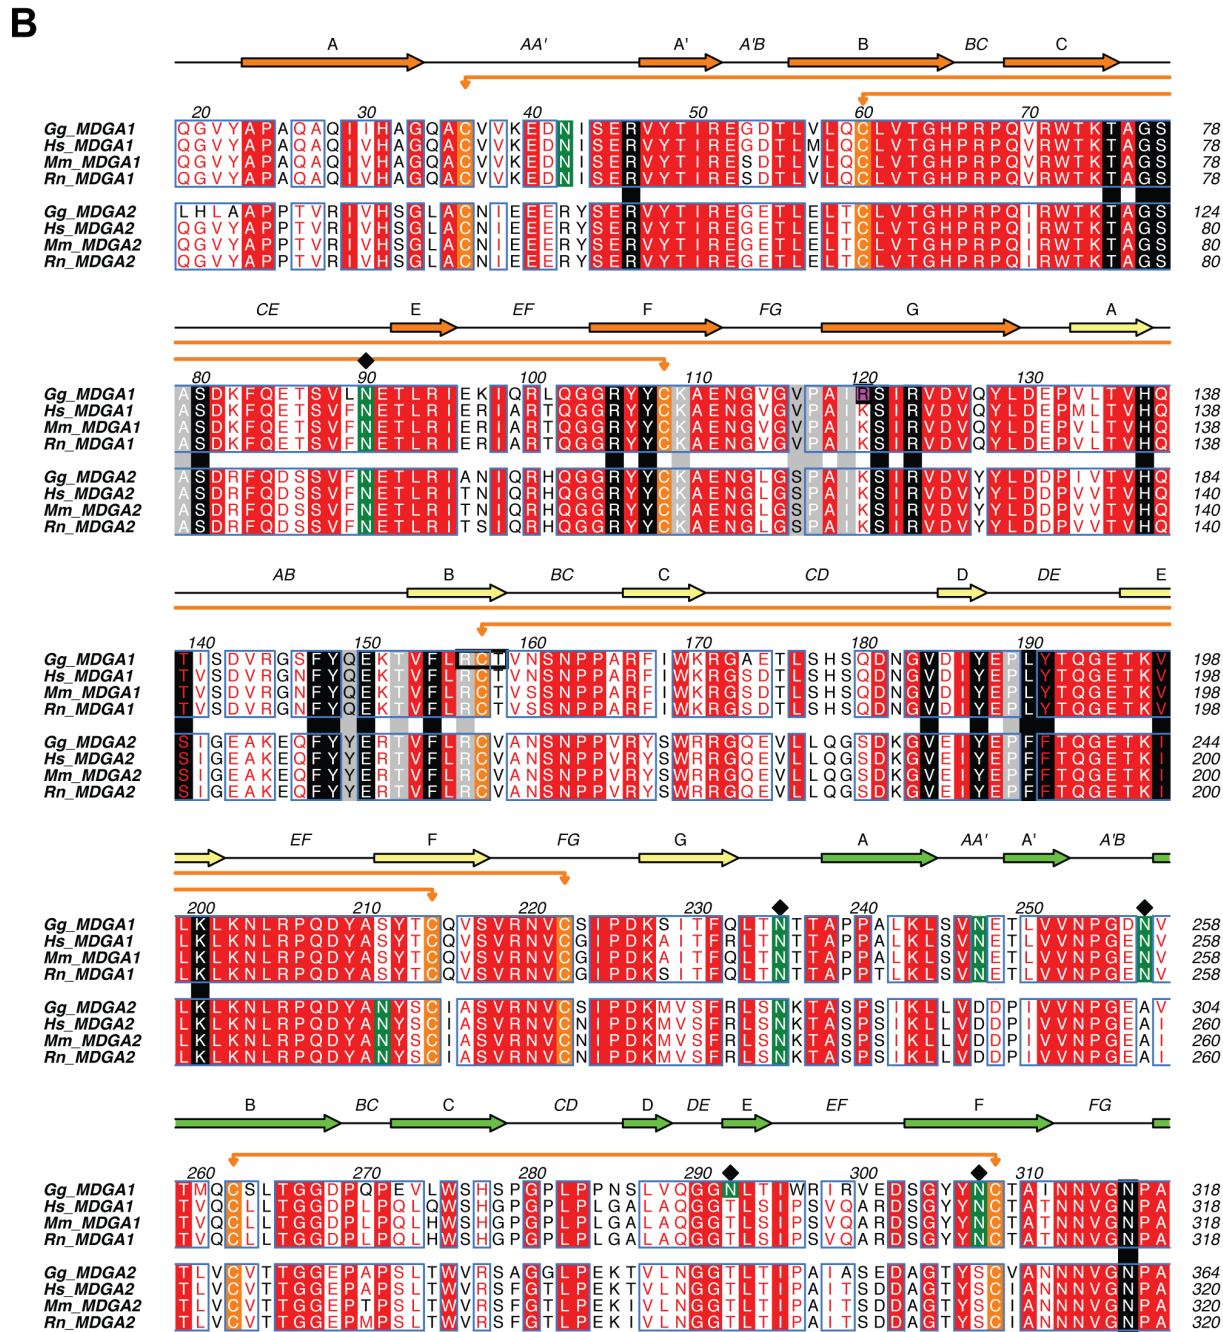

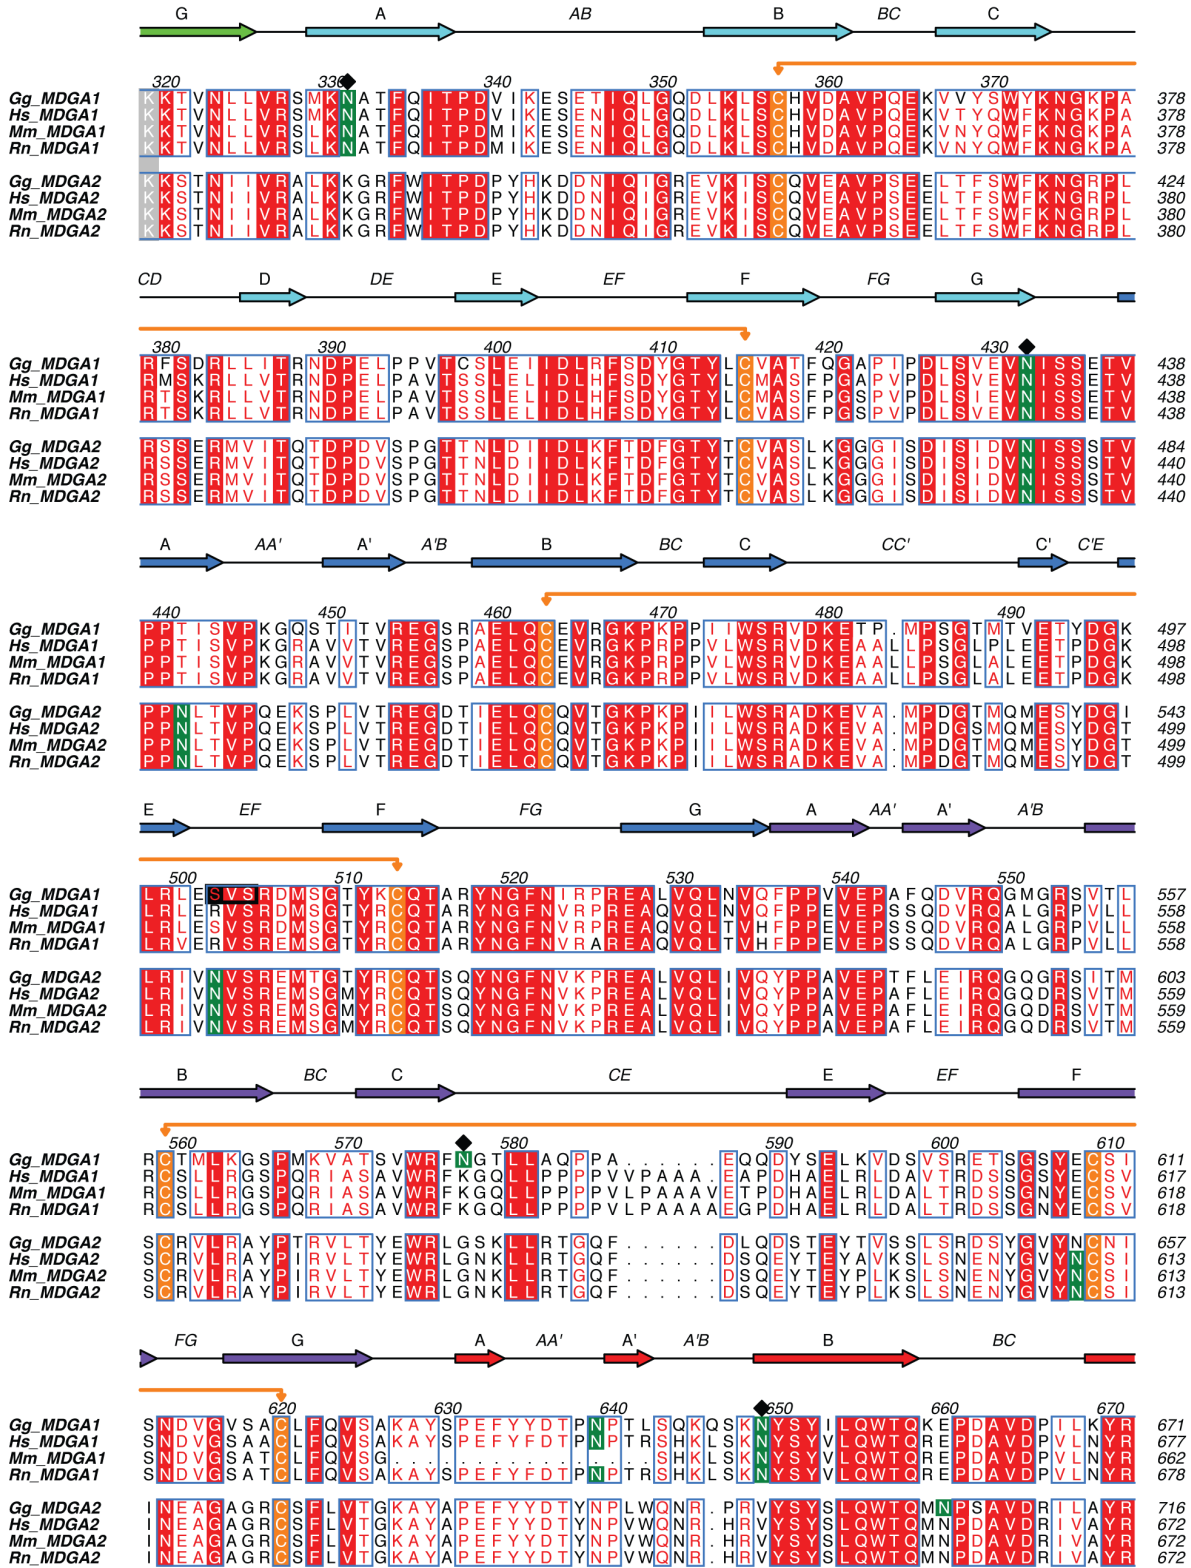

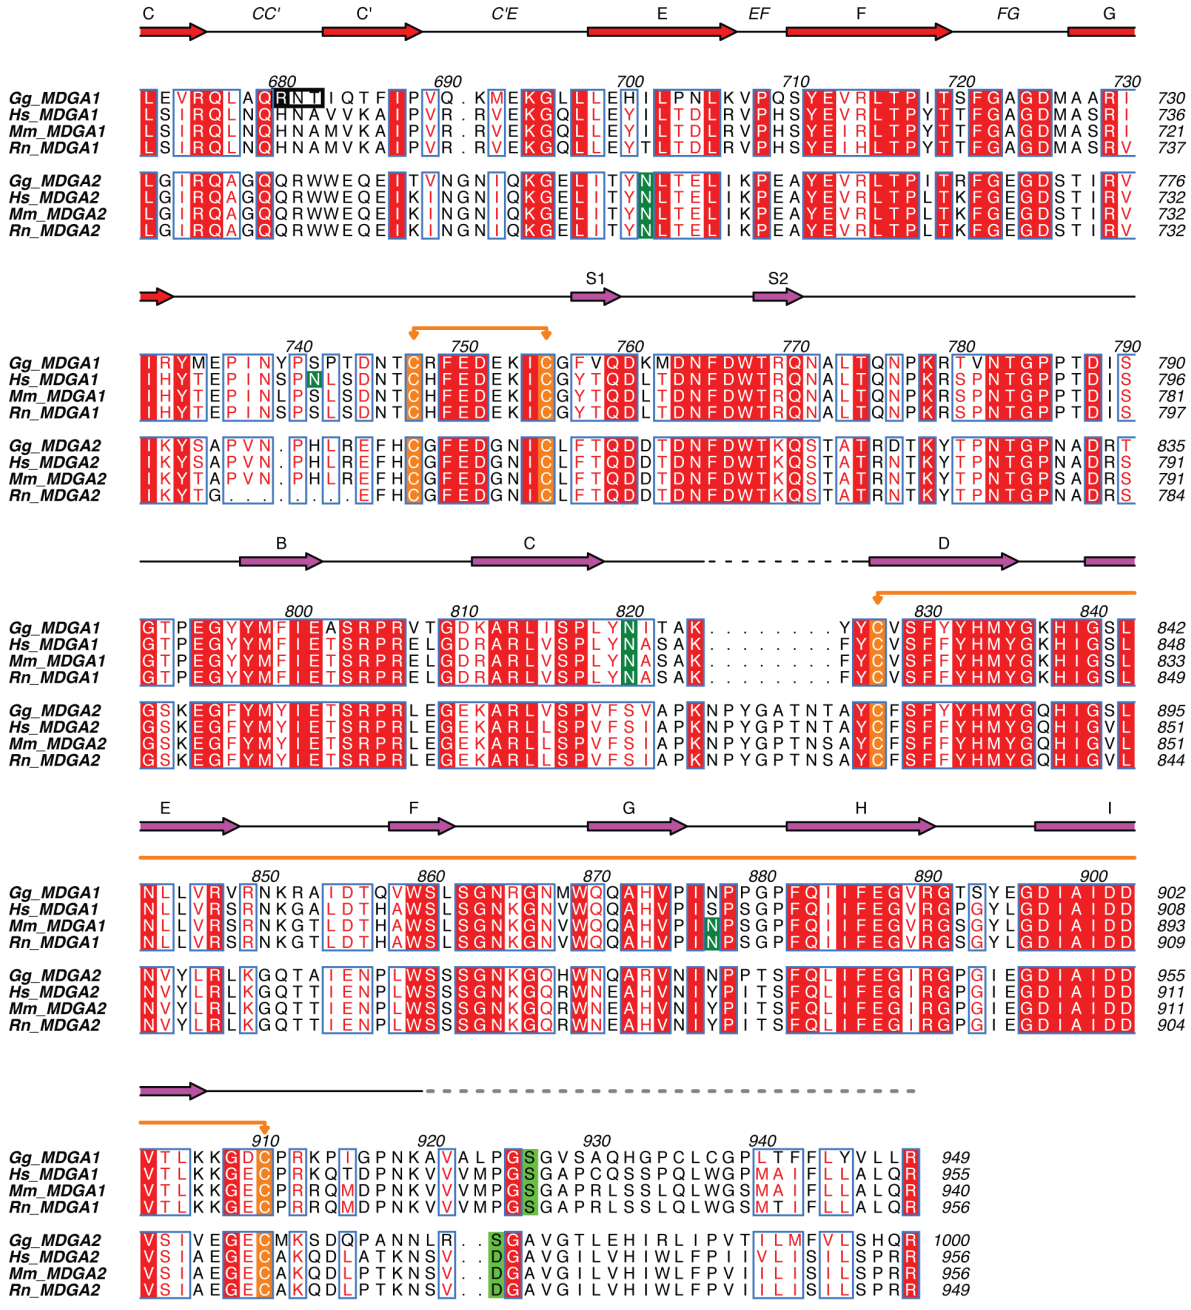

**Figure S1. Sequence Alignment of the MDGA1 and -2 Ectodomains. Related to Figure 1 and Figure 2.**

**(A)** Schematic representation of the chicken MDGA1 domain structure. Black diamonds denote predicted N-linked glycosylation sites.

**(B)** Amino acid sequences are taken from the UniProt database (entry code); *Gg\_MDGA1* (Q0WYX8), *Hs\_MDGA1* (Q8NFP4), *Mm\_MDGA1* (Q0PMG2), *Rn\_MDGA1* (P85171), *Gg\_MDGA2* (F1NIA0), *Hs\_MDGA2* (Q7Z553), *Mm\_MDGA2* (P60755), *Rn\_MDGA2*

(P60756). *Gg*; *Gallus gallus*, *Hs*; *Homo sapiens*, *Mm*; *Mus Musculus*, *Rn*; *Rattus norvegicus*. Secondary structure elements for *Gg*\_MDGA1 are annotated above the alignment. MDGA1 cysteine residues participating in disulfide bonds are shaded in orange and connected by orange lines. Putative N-linked glycosylation sites for all MDGA members are shaded in dark green. Black diamonds further highlight crystallographically confirmed N-linked MDGA1 glycosylation sites. The predicted residue positions where amide linking of the GPI anchor occurs (Ser932 in *Hs*\_MDGA1 and Asp931 in *Hs*\_MDGA2) are shaded in green. Positions where N-linked glycan consensus sequences (Asn-X-Ser/Thr) were inserted at cMDGA1<sub>ECTO</sub> crystallographic homophilic interfaces (Arg156Asn in Ig<sub>2</sub>, Ser502Asn in Ig<sub>5</sub>, and Arg680Asn in FnIII<sub>7</sub>) are boxed in black. The Arg120Lys (R120K) mutation, introduced to bring the chicken MDGA1 sequence in line with the human, rat and mouse MDGA1-2 sequences at that position, is shaded in magenta and boxed in black. MDGA Ig<sub>1</sub>, Ig<sub>2</sub>, and Ig<sub>3</sub> residues in the “core” and at the “rim” of the NL–MDGA interface are highlighted in black and grey vertical rectangles, respectively. Ig<sub>1</sub> is an I-set Ig superfamily (IgSF) domain, however it lacks strand C' and D (AA'BCEFG). Ig<sub>2</sub> is a canonical C1-set IgSF domain (ABCDEFGF). Ig<sub>3</sub> is an I-set IgSF domain, however it lacks strand C' (AA'BCDEFG). Ig<sub>4</sub> is a canonical C1-set IgSF domain (ABCDEFGF). Ig<sub>5</sub> is an I-set IgSF domain, however it lacks strand D (AA'BCC'EFG). Ig<sub>6</sub> is an I-set IgSF domain, however it lacks strand C' and D (AA'BCEFG), similarly to Ig<sub>1</sub>. Additionally, there is no canonical disulfide bond between strand B (Cys559) and strand F (Cys609) in Ig<sub>6</sub>. Instead, Cys559 pairs with Cys620 on strand G. Finally, FnIII<sub>7</sub> is C2-set, and strand A is divided into strand A and A', separated by a long loop (AA'BCC'EFG).

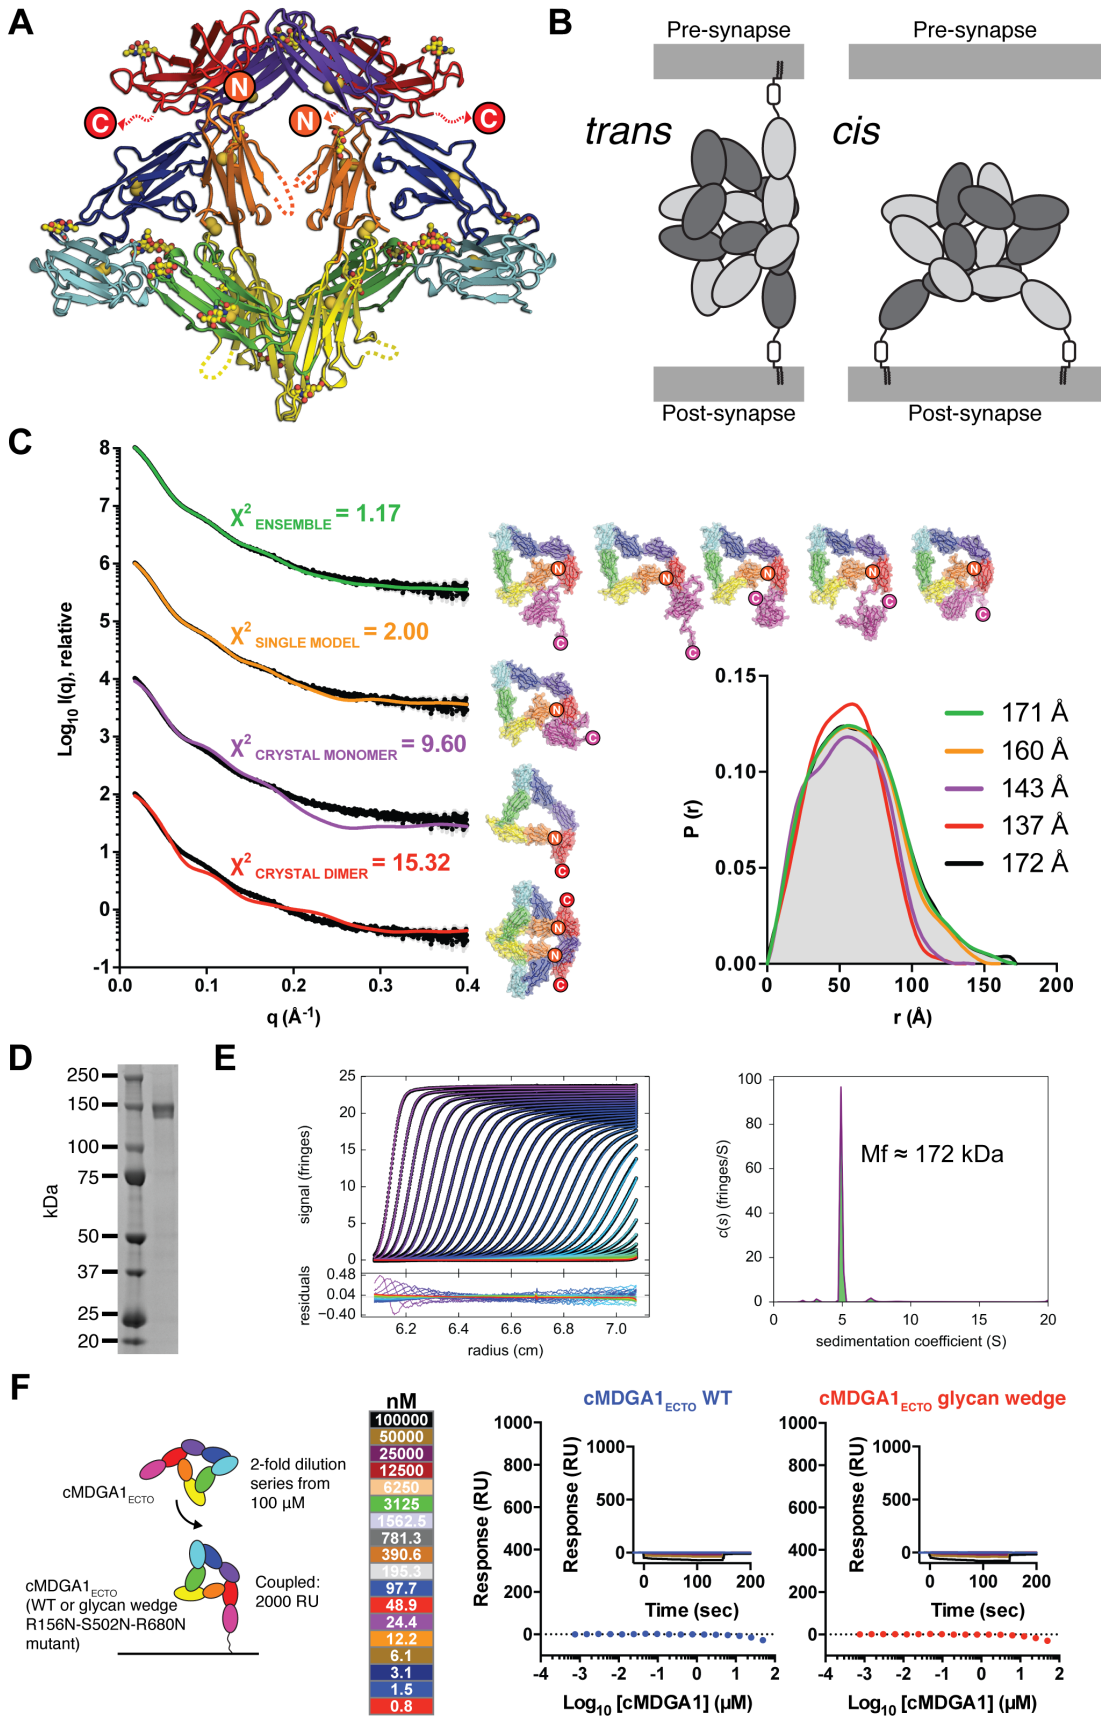

**Figure S2. MDGA1 is Monomeric in Solution. Related to Figure 1.**

**(A)** Cartoon representation of the intertwined crystallographic cMDGA1<sub>ECTO</sub> dimer.

**(B)** Schematic representation of the potential MDGA1 homophilic *trans*-dimer or *cis*-dimer, GPI-anchored to the pre- and/or postsynaptic membranes.

**(C)** Solution structure of cMDGA1<sub>ECTO</sub>. Experimental scattering curves (black) and calculated scattering patterns (colored) are shown to a maximal momentum transfer of  $q = 0.40 \text{ \AA}^{-1}$ . Individual data:fit pairs are displaced along an arbitrary y axis to allow for better visualization. Bottom curve: cMDGA1 crystallographic dimer (red). Second curve from bottom: extracted cMDGA1<sub>ECTO</sub> crystallographic monomer (purple). Second curve from top: best single monomeric model (orange). Top curve: best five-membered minimal ensemble (green). Atomic models, corresponding to the individual curves, are shown in ribbon and surface representation. The inset shows the experimental (black line and grey shade) and calculated (colored) pairwise distance distribution ( $P(r)$ ) functions and derived maximum intra-particle distance ( $D_{MAX}$ ) values.

**(D)** SDS-PAGE of glycosylated human MDGA1<sub>ECTO</sub> (hMDGA1<sub>ECTO</sub>), showing an apparent molecular weight of ~150 kDa.

**(E)** SV-AUC data for hMDGA1<sub>ECTO</sub> at 60  $\mu\text{M}$ . The sedimentation coefficient is ~5.1 S, and there is no indication of oligomer formation. The derived molar mass is consistent with a glycosylated, monomeric hMDGA1<sub>ECTO</sub> molecule.

**(F)** Lack of detectable cMDGA1<sub>ECTO</sub> self-interaction. Schematic representation of the structure-guided cMDGA1<sub>ECTO</sub> glycan wedge mutant (cMDGA1<sub>ECTO</sub>-GW; combined Arg156Asn, Ser502Asn and Arg680Asn mutations); these mutations were chosen to disrupt crystallographically observed homophilic interfaces. Binding isotherms and sensorgrams for the (self-)interaction of wild-type cMDGA1<sub>ECTO</sub> and cMDGA1<sub>ECTO</sub>-GW with wild-type cMDGA1<sub>ECTO</sub> are shown. cMDGA1<sub>ECTO</sub>-GW serves as negative control for the detection of a potential cMDGA1<sub>ECTO</sub>-cMDGA1<sub>ECTO</sub> self-interaction.

**A**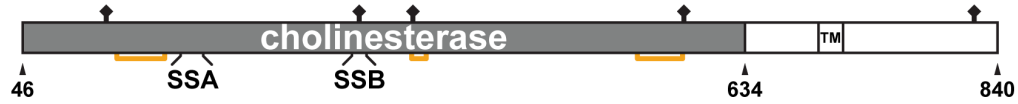**B**

**NL1 A1** VKRISKECARKPGKKICRKG  
**NL1 A2** GPLTKKQTDDLGDNDGAEDE  
**NL1 A1A2** VKRISKECARKPGKKICRKGGLTKKQTDDLGDNDGAEDE  
**NL2 A** GPLTKKRDEATLNPPDT  
**NL3 A1** VKRISKECARKPNKKICRKG  
**NL3 A2** GSGAKKQGEDLADNDGDEDE  
**NL3 A1A2** VKRISKECARKPNKKICRKGSGAKKQGEDLADNDGDEDE

**C**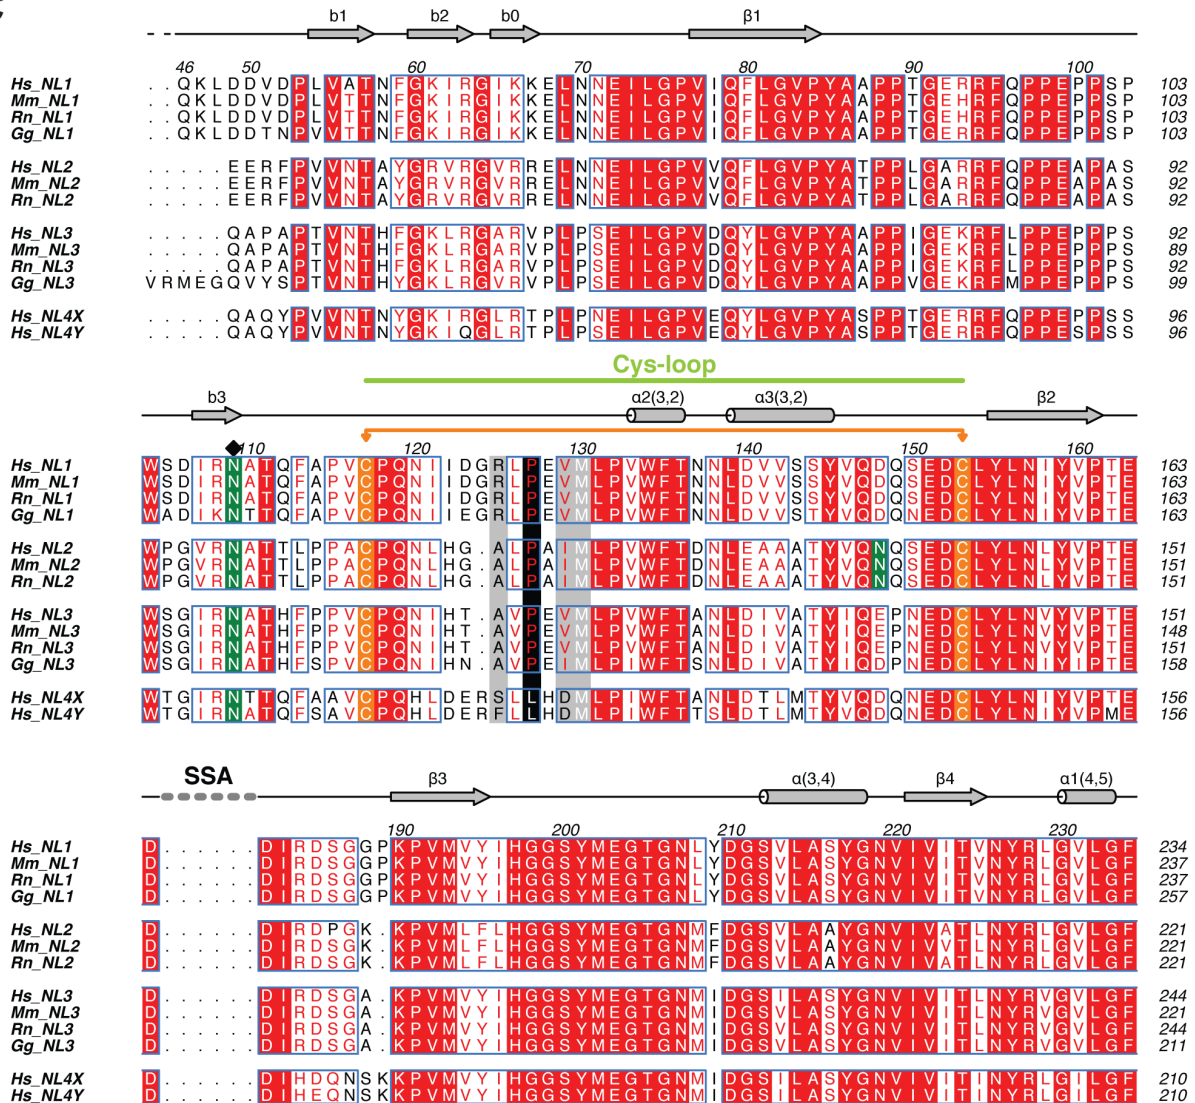



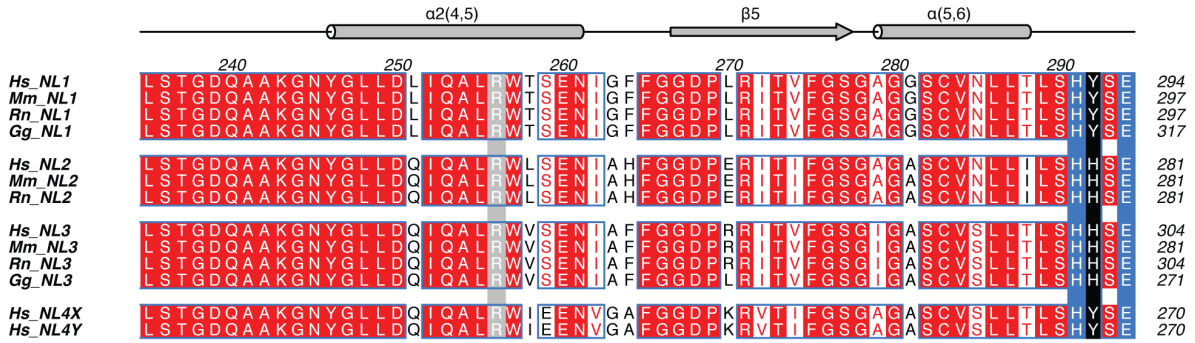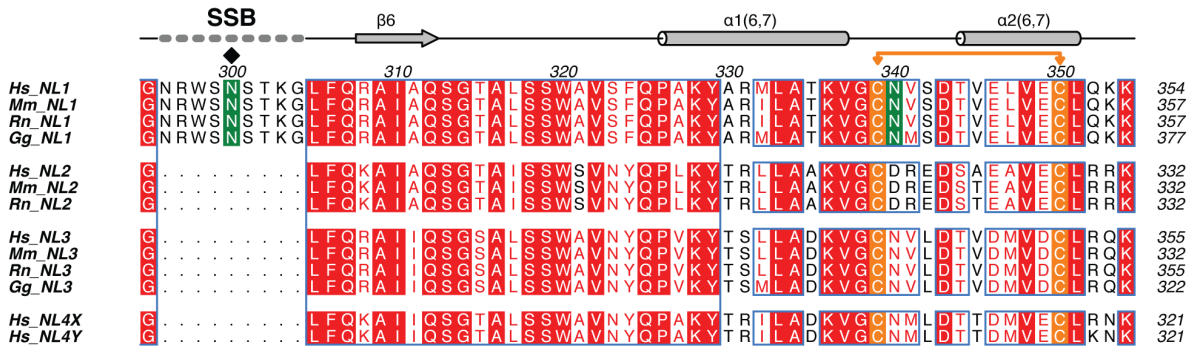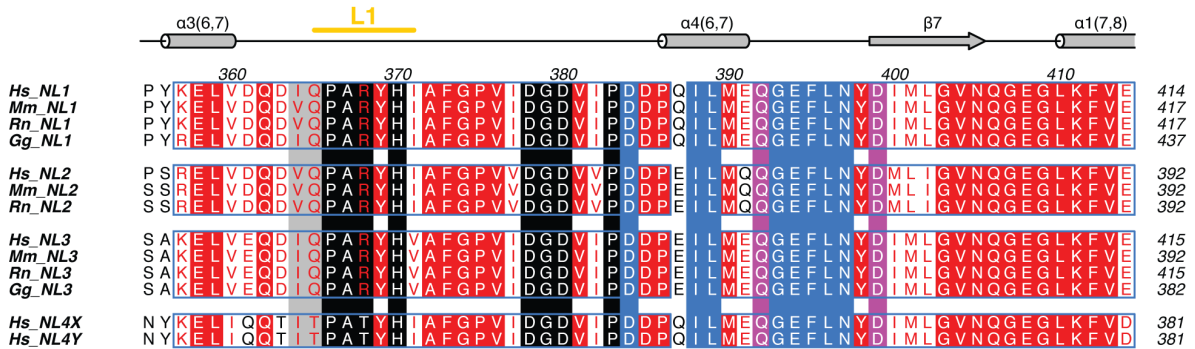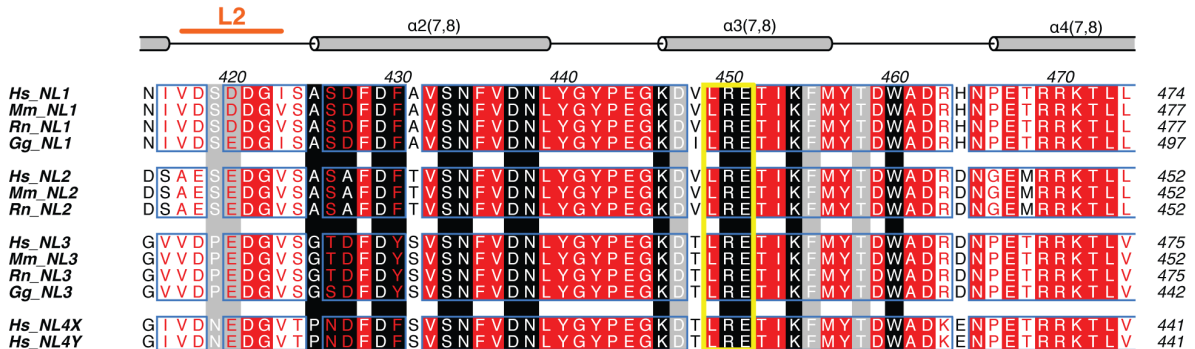

LRE-motif

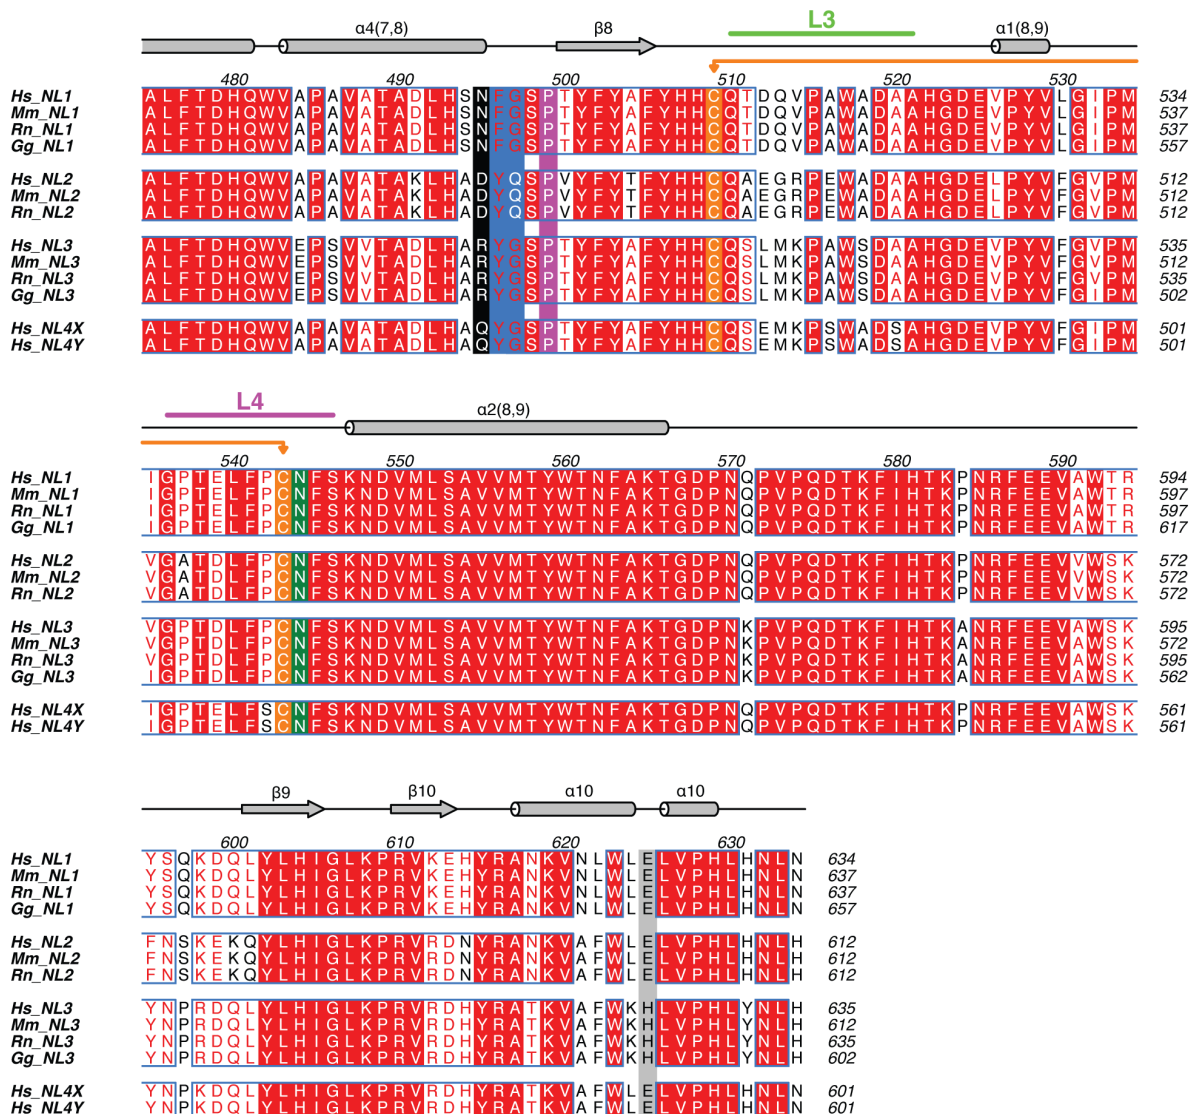

**Figure S3. Sequence Alignment of the NL1, -2, -3, -4 and -5 Cholinesterase Domains. Related to Figure 2.**

**(A)** Schematic representation of the human NL1 domain structure. SSA: spliced sequence A, SSB: spliced sequence B, TM: trans-membrane.

**(B)** Sequences of the different possible NL1, NL2 and NL3 spliced sequences A.

**(C)** Amino acid sequences are taken from the UniProt database (entry code); *Hs\_NL1* (Q8N2Q7), *Mm\_NL1* (Q99K10), *Rn\_NL1* (Q62765), *Gg\_NL1* (D2X2H3), *Hs\_NL2* (Q8NFZ4), *Mm\_NL2* (Q69ZK9), *Rn\_NL2* (Q62888), *Hs\_NL3* (Q9NZ94), *Mm\_NL3* (Q8BYM5), *Rn\_NL3* (Q62889), *Gg\_NL3* (D3WGL3), *Hs\_NL4X* (Q8N0W4), *Hs\_NL4Y* (*Hs\_NL5*: Q8NFZ3). *Hs*; *Homo sapiens*, *Mm*; *Mus Musculus*, *Rn*; *Rattus norvegicus*, *Gg*; *Gallus gallus*. Secondary structure elements for

*Hs\_NL1* are annotated above the alignment. *Hs\_NL1* cysteine residues participating in disulfide bonds are shaded in orange and connected by orange lines. Putative N-linked glycosylation sites for all NL members are shaded in dark green (black diamonds further highlight crystallographically confirmed N-linked NL1 glycosylation sites). NL residues unique to the “core” and “rim” of the NL–MDGA interface are highlighted in black and grey vertical rectangles, respectively. NL residues unique to the NL–NRX interface are highlighted in pink vertical rectangles. NL residues that are shared between the NL–MDGA and NL–NRX interfaces are highlighted in blue vertical rectangles. The Leu-Arg-Glu (LRE) motif, conserved in all NLs and located in the  $\alpha 3(7,8)$  helix, is boxed in yellow. The positions of the Cys-loop and of loops L1, L2, L3 and L4 are indicated.

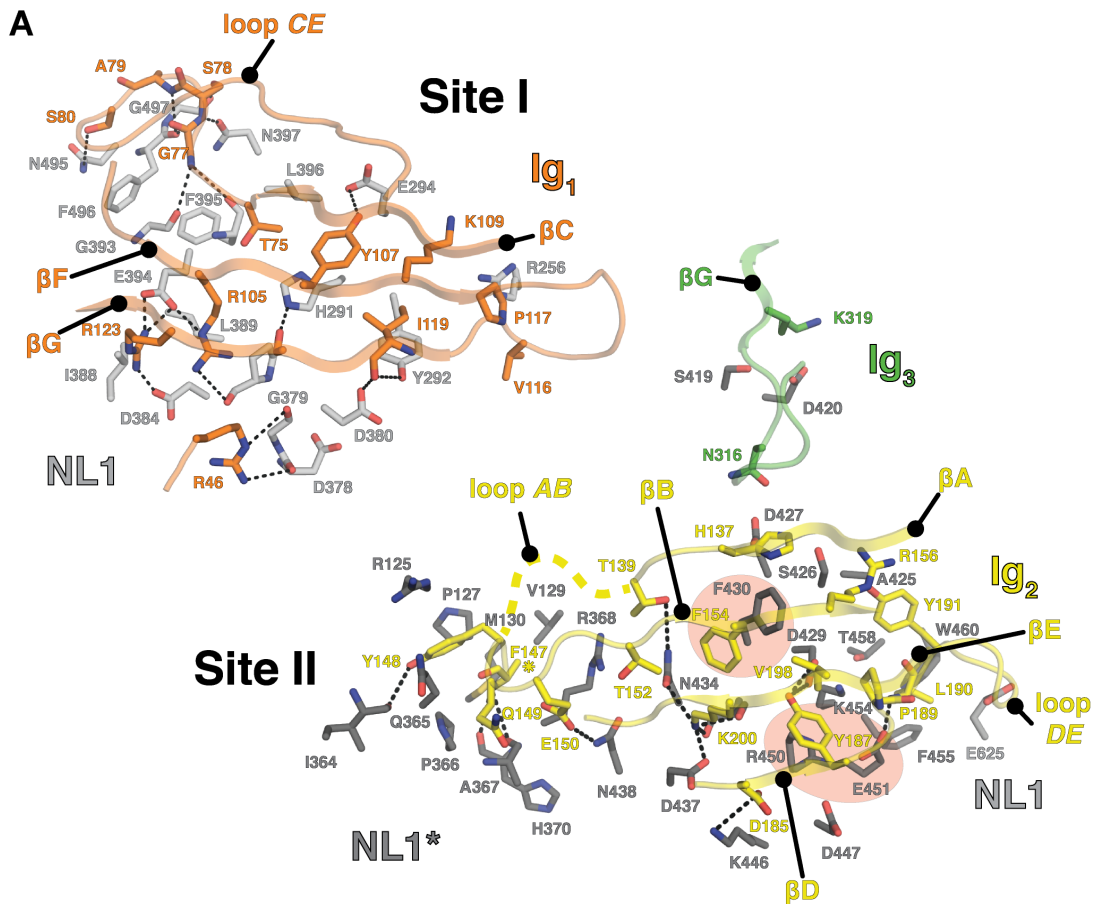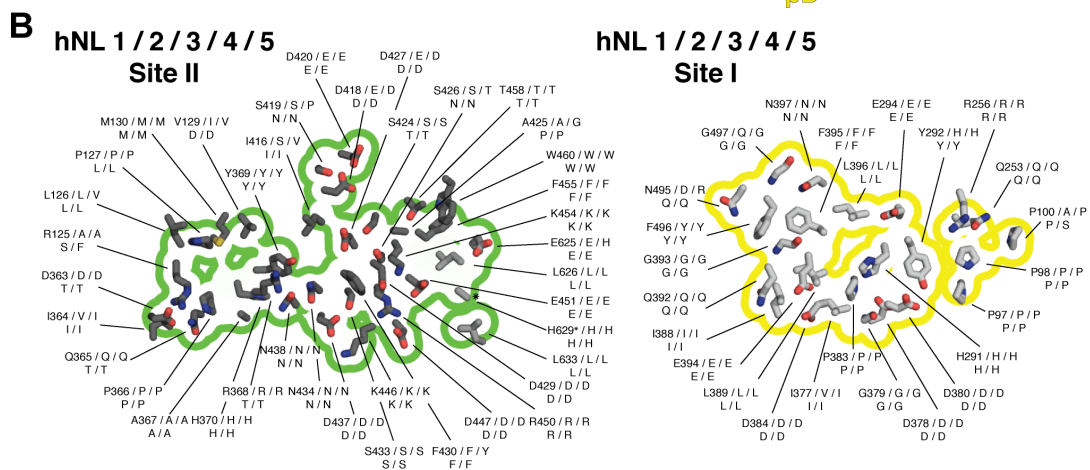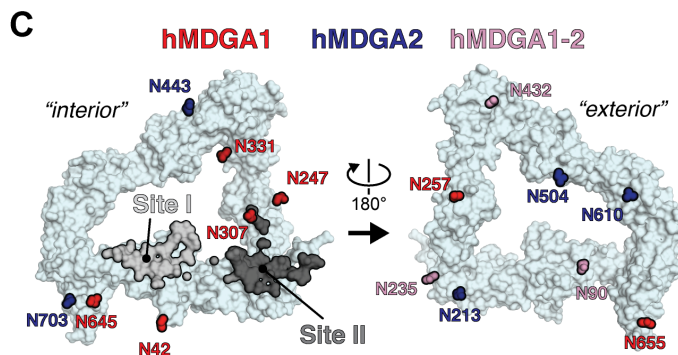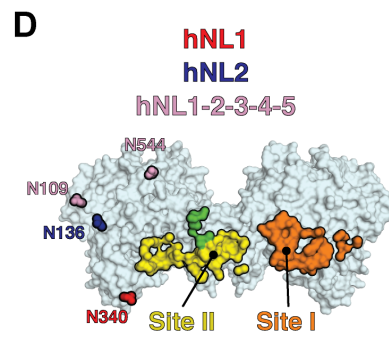

**Figure S4. Details and Conservation of the NL–MDGA Site I and Site II Interfaces. Mapping of Human MDGA1 and MDGA2 Glycosylation Sites. Related to Figure 3.**

**(A)** Atomic details of the NL1–MDGA1 Site I and Site II interfaces. Putative hydrogen bonds and hydrophilic interactions are indicated with black dashed lines. Star symbols (\*) indicate residues for which side chain electron density was not clearly discernable. The Phe<sub>NL1</sub>430–Phe<sub>MDGA1</sub>154  $\pi$ - $\pi$  sandwich stacking interaction, as well as Arg<sub>NL1</sub>450 and Glu<sub>NL1</sub>451 of the NL1 LRE motif, are highlighted with shaded ovals.

**(B)** View of the NL1 interaction interface. Site I and Site II interfaces are outlined by yellow and green lines, respectively. Per residue position, equivalent residues in human NL1, -2, -3, -4(X) and -5(=4(Y)) are annotated to highlight overall sequence conservation of the interaction interfaces. Star symbols (\*) indicate residues for which side chain electron density was not clearly discernable.

**(C)** N-linked glycosylation sites common to human MDGA1 and -2 (pink), or unique to human MDGA1 (red) or human MDGA2 (blue) are annotated onto the cMDGA1<sub>ECTO</sub> structure. Site I and Site II interfaces are shown in surface representation. The hMDGA1-specific Asn307 (N307) is proximal to the edge of the Site II interface.

**(D)** N-linked glycosylation sites common to human NL1-2-3-4-5 (pink), or unique to human NL1 (red) or human NL2 (blue) are annotated onto the hNL1(-A-B)<sub>ECTO</sub> structure. Site I and Site II interfaces are shown in surface representation as in Figure 3A.

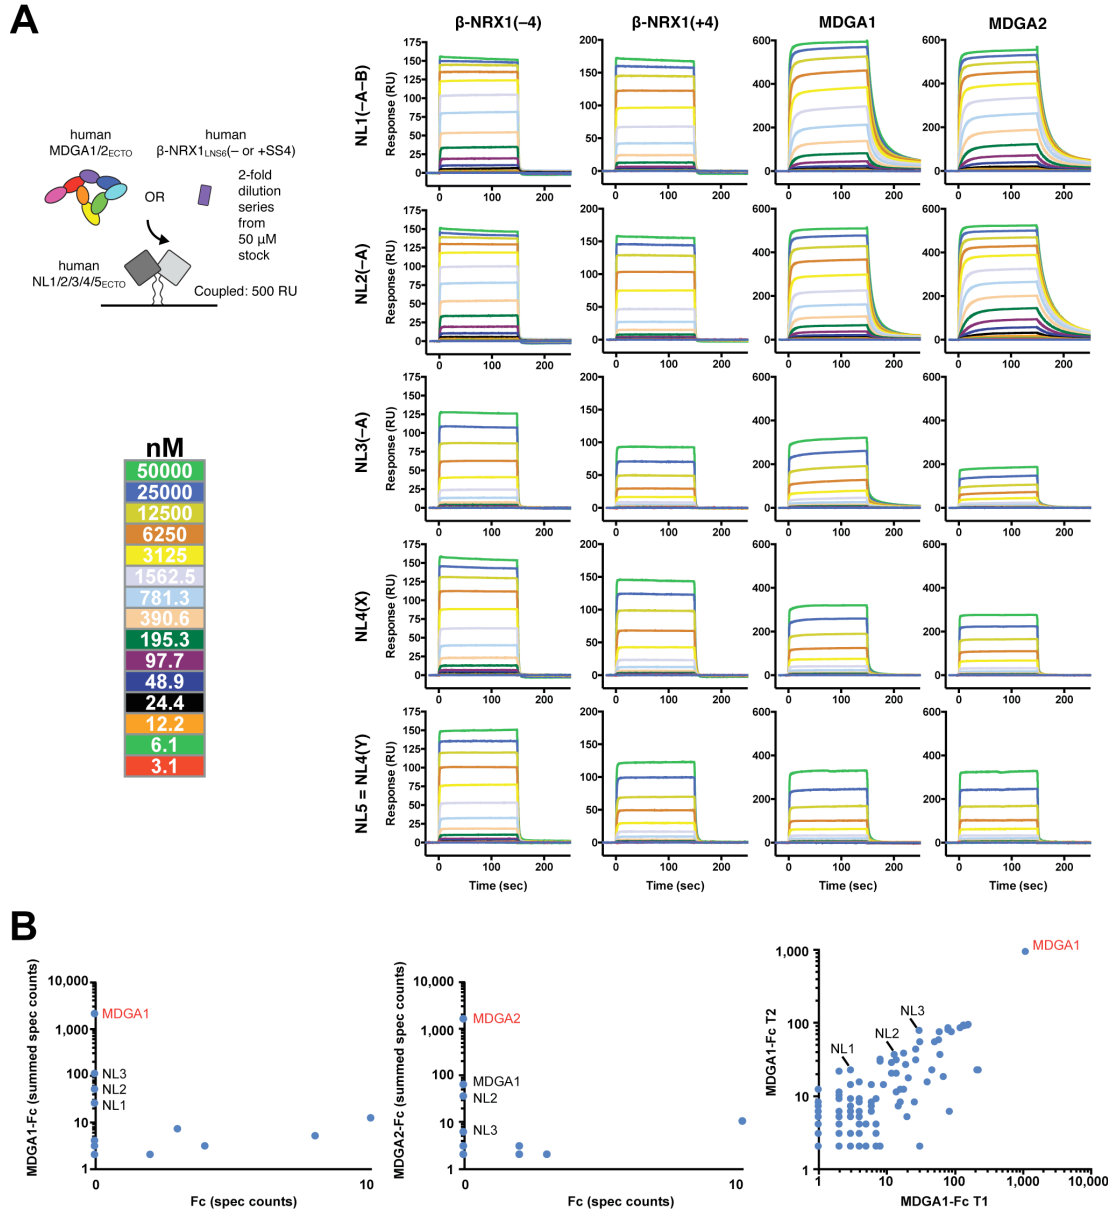

**Figure S5. NL–NRX and NL–MDGA SPR Equilibrium Experiments. MDGA1 and -2 Pulldown Experiments. Related to Figure 5.**

(A) Schematic representation of the SPR setup, and sensorgrams for the interaction of the human NL1, NL2, NL3, NL4 and NL5 cholinesterase domains, lacking splice inserts, with human  $\beta$ -NRX1<sub>LNS6</sub> lacking and containing spliced sequence 4 ( $\beta$ -NRX1<sub>LNS6</sub>(–4) and  $\beta$ -NRX1<sub>LNS6</sub>(+4), respectively), and with human MDGA1<sub>ECTO</sub> and MDGA2<sub>ECTO</sub>. The corresponding binding isotherms and  $K_D$  values are presented in Figure 5A.

**(B)** The graphs show the summed spectra count (spec count) for all surface proteins identified in two independent MDGA1-Fc or MDGA2-Fc pulldown experiments from rat brain synaptosome extracts, each compared to two negative control Fc experiments. NL1-3 are the main surface proteins specifically identified by MDGA1-Fc. MDGA2-Fc bait protein identifies NL2 and NL3 as interactors.

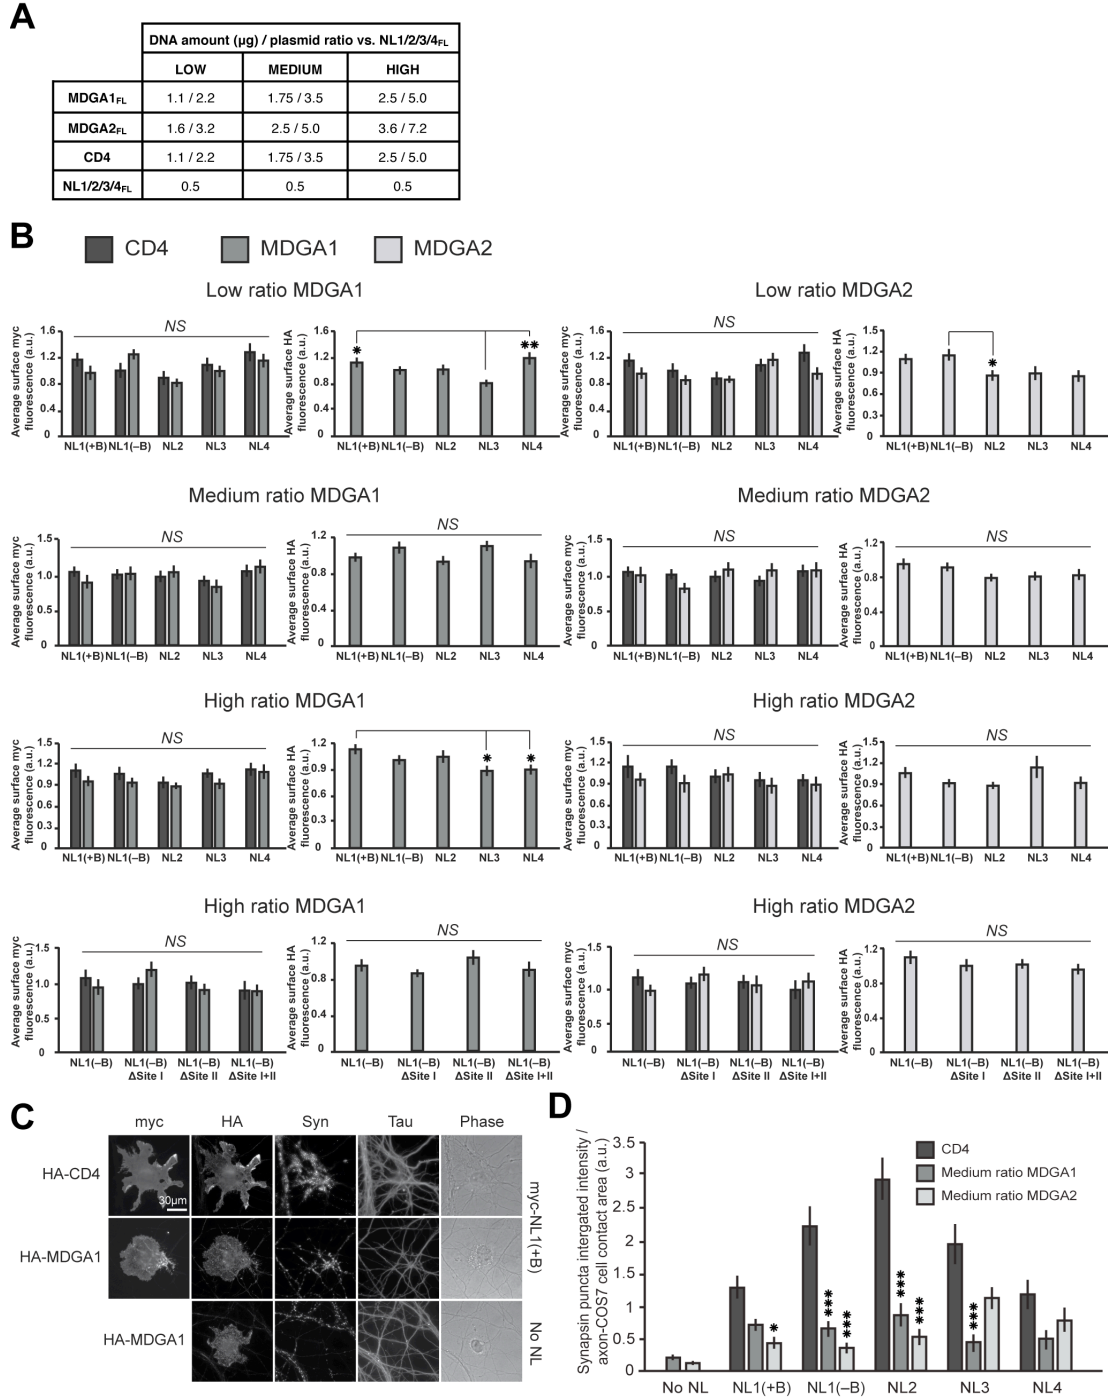

**Figure S6. Comparable Levels of Surface NLs And MDGAs in the Hemi-synapse Formation Assays. Related to Figure 5, Figure 6, and Figure 8.**

**(A)** Summary of MDGA:NL plasmid DNA ratios.

**(B)** COS-7 cells chosen for analysis displayed similar levels of myc-NL1-4 and HA-MDGA1-2 in each co-culture experiment. For each condition (low ratio MDGA1, medium ratio MDGA1,



high ratio MDGA1, low ratio MDGA2, medium ratio MDGA2, and high ratio MDGA2) the mean myc signal (for surface NLs) and mean HA signal (for surface MDGAs) was measured and cells that did not have similar levels of each protein were excluded from analysis. One-way ANOVA with Bonferonni *post hoc* comparison was used to determine statistical significance. Error bars represent the SEM. \*,  $p < 0.05$ , \*\*,  $p < 0.01$ .

**(C)** Examples are shown for all the channels imaged for myc-NL1(-A+B) co-transfected with HA-CD4 or HA-MDGA1, and for the HA-MDGA1 only (no NL) negative control. Scale bar is 30  $\mu\text{m}$ .

**(D)** The bar graph shows the hemi-synapse formation assay data for MDGA1 and MDGA2 at medium ratio without normalization. Each NL co-transfected with CD4 shows a different baseline level of synapsin clustering, with NL2 being the most potent and NL4 being the least potent at hemi-synapse induction. Error bars represent the SEM. \*,  $p < 0.05$ , \*\*\*,  $p < 0.001$ .

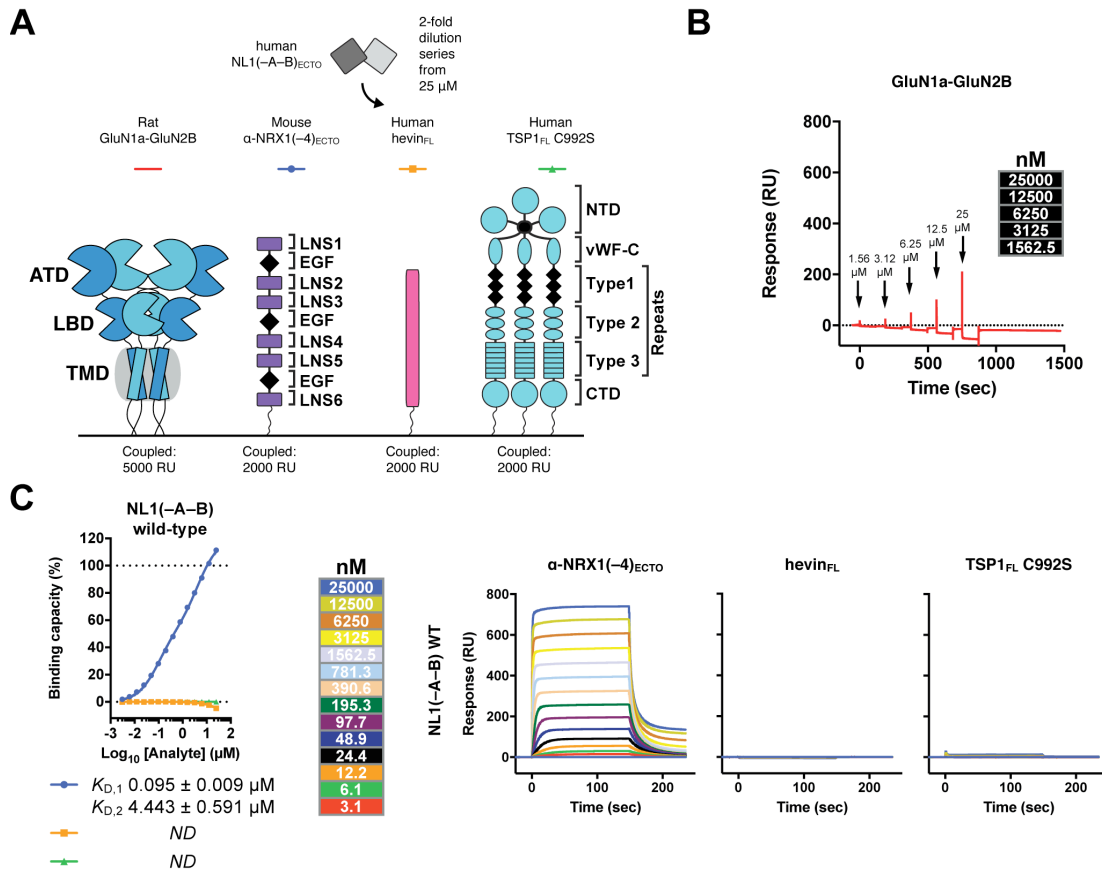

**Figure S7. Assessment of Binding of NL1 with Hevin, Thrombospondin-1 and the NMDA Receptor. Related to Figure 5.**

(A) Schematic representation of the SPR setup.

(B) Single-cycle kinetics (SCK) sensorgram of the interaction of NL1(-A-B)<sub>ECTO</sub> with the GluN2a-GluN2B NMDA receptor.

(C) Binding isotherms and sensorgrams for the interaction of the human NL1(-A-B)<sub>ECTO</sub> cholinesterase domains with mouse  $\alpha$ -NRX1<sub>ECTO</sub>(-4), full-length (FL) human hevin (hevin<sub>FL</sub>) and human TSP1<sub>FL</sub>.

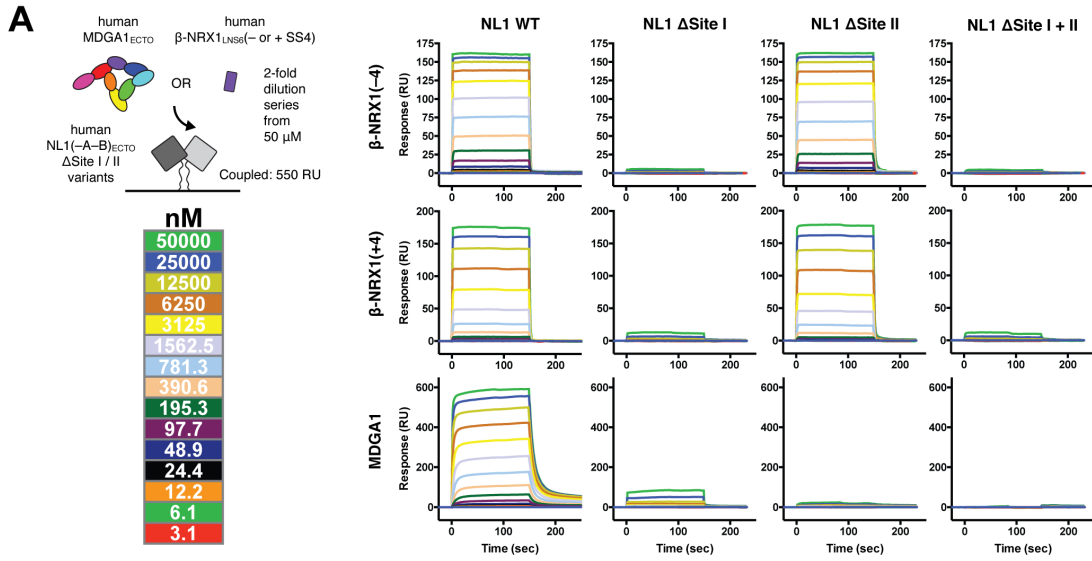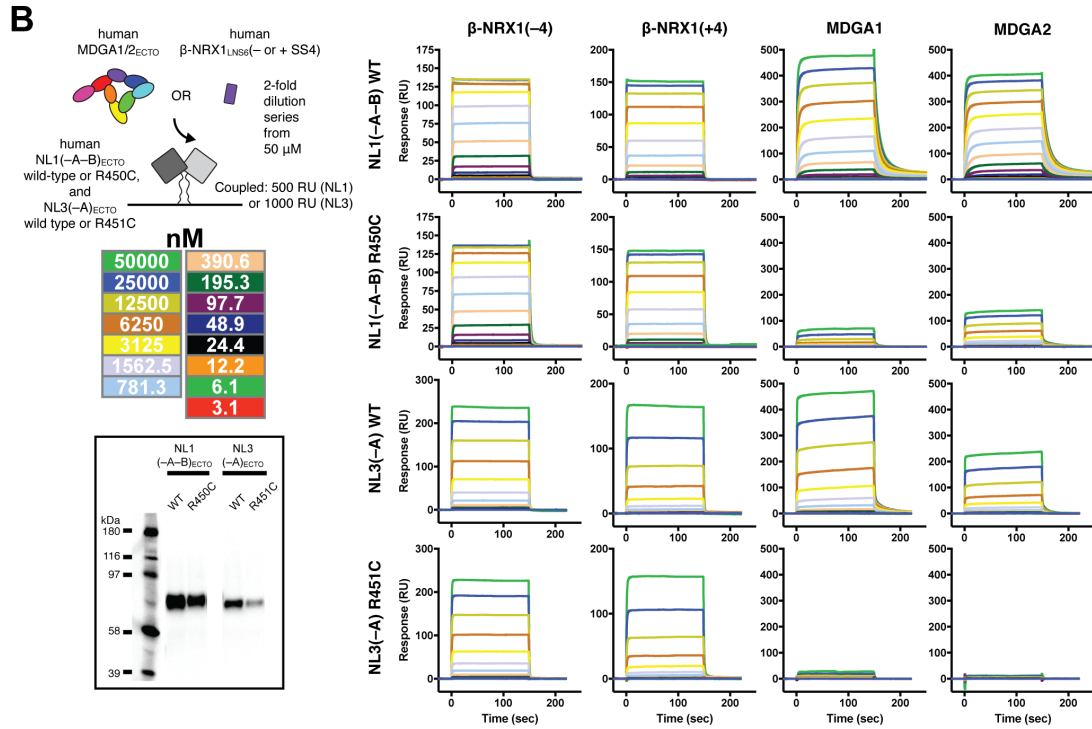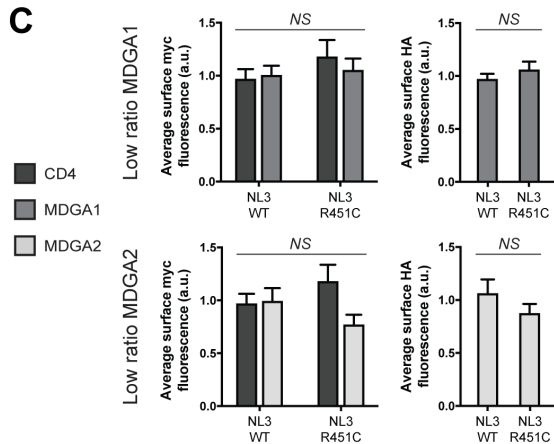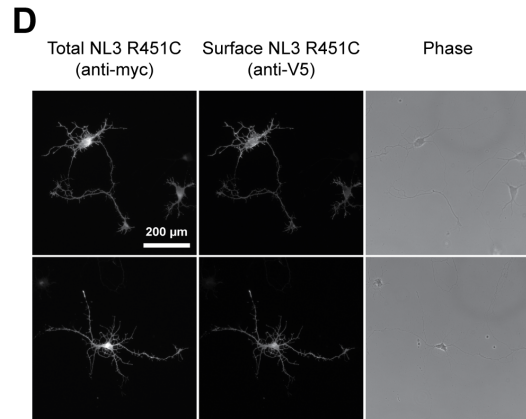

**Figure S8. Mutational Analysis of the NL1 Site I and Site II Interfaces. Effect of the ASD-linked NL3 Mutation Arg451Cys on the Interaction of NL3 with MDGA1 and MDGA2. Related to Figure 6 and Figure 7.**

**(A)** Schematic representation of the SPR setup, and sensorgrams for the interaction of wild-type human NL1(-A-B)<sub>ECTO</sub> and the human NL1(-A-B)<sub>ECTO</sub> Site I ( $\Delta$ Site I), Site II ( $\Delta$ Site II) and Site I+II ( $\Delta$ Site I+II) core interface mutants, with human  $\beta$ -NRX1<sub>LNS6</sub> lacking and containing spliced sequence 4 ( $\beta$ -NRX1<sub>LNS6</sub>(-4) and  $\beta$ -NRX1<sub>LNS6</sub>(+4), respectively), and with human MDGA1<sub>ECTO</sub>. Consistent with the respective crystal structures (Figure 4A),  $\Delta$ Site II abolishes MDGA1 binding, but does not affect  $\beta$ -NRX1 binding. The corresponding binding isotherms and  $K_D$  values are presented in Figure 6B.

**(B)** Schematic representation of the SPR setup, and sensorgrams for the interaction of the human NL1, NL1 Arg450Cys, NL3 and NL3 Arg451Cys cholinesterase domains, lacking splice inserts, with human  $\beta$ -NRX1<sub>LNS6</sub> lacking and containing spliced sequence 4 ( $\beta$ -NRX1<sub>LNS6</sub>(-4) and  $\beta$ -NRX1<sub>LNS6</sub>(+4), respectively), and with human MDGA1<sub>ECTO</sub> and MDGA2<sub>ECTO</sub>. The corresponding binding isotherms and  $K_D$  values are presented in Figure 7C. The inset shows a Western blot of the NL1(-A-B)<sub>ECTO</sub>-WT, NL1(-A-B)<sub>ECTO</sub>-R450C, NL3(-A)<sub>ECTO</sub>-WT and NL3(-A)<sub>ECTO</sub>-R451C proteins secreted by HEK293T cells into the growth medium. Detection of the biotinylated Avitag was performed using streptavidin-HRP conjugate (1:50,000 dilution, Sigma Aldrich).

**(C)** Comparable levels of surface NL3 and MDGAs in the hemi-synapse formation assay. COS-7 cells chosen for analysis displayed similar levels of myc-NL3 and HA-MDGA1-2 in each co-culture experiment. The mean myc signal (for surface NL3s) and mean HA signal (for surface MDGAs) was measured and cells that did not have similar levels of each protein were excluded from analysis. One-way ANOVA with Bonferonni *post hoc* comparison was used to determine statistical significance. Error bars represent the SEM.

**(D)** Expression of full-length human Myc-V5-NL3-R451C on the cell surface of rat hippocampal neurons. Representative images of neurons immunostained for total myc-NL3 or for surface V5-NL3 are shown. Scale bar is 200  $\mu$ m.

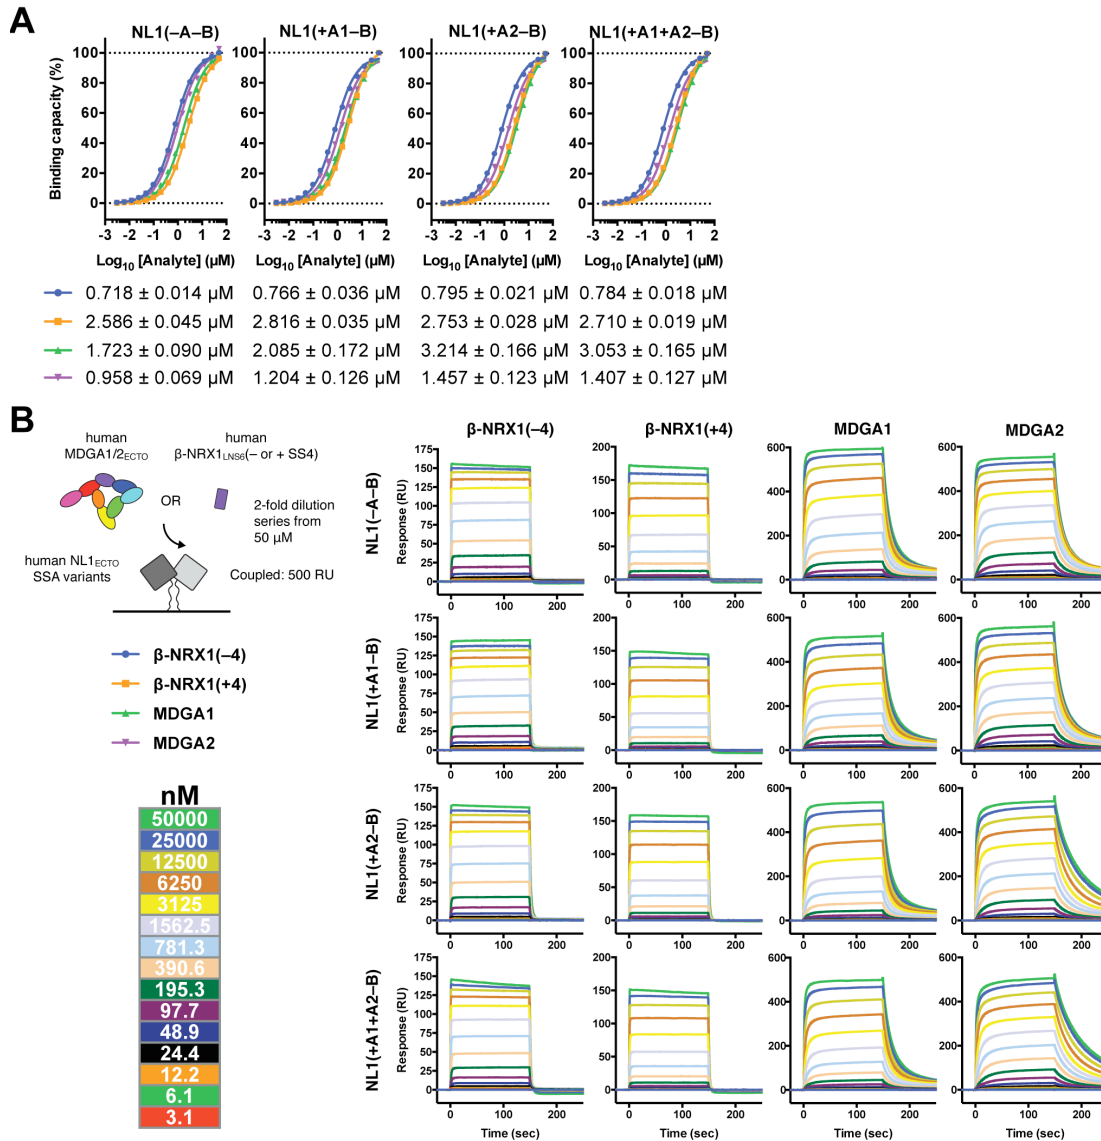

**Figure S9. NL1 Spliced Sequence A (SSA) Does Not Modulate NL1–NRX or NL1–MDGA Interactions. Related to Figure 8.**

(A) Binding isotherms and summary of  $K_D$  values for the interaction of the human NL1( $\pm$ A1 $\pm$ A2–B)<sub>ECTO</sub> cholinesterase domains with human  $\beta$ -NRX1<sub>LNS6</sub> lacking and containing spliced sequence 4 ( $\beta$ -NRX1<sub>LNS6</sub>(–4) and  $\beta$ -NRX1<sub>LNS6</sub>(+4), respectively), and with human MDGA1<sub>ECTO</sub> and MDGA2<sub>ECTO</sub>. Data for NL1(–A–B)<sub>ECTO</sub> have been repeated here from Figures 5A and S5A for clearer comparison.

(B) Schematic representation of the SPR setup and sensorgrams corresponding to (A).

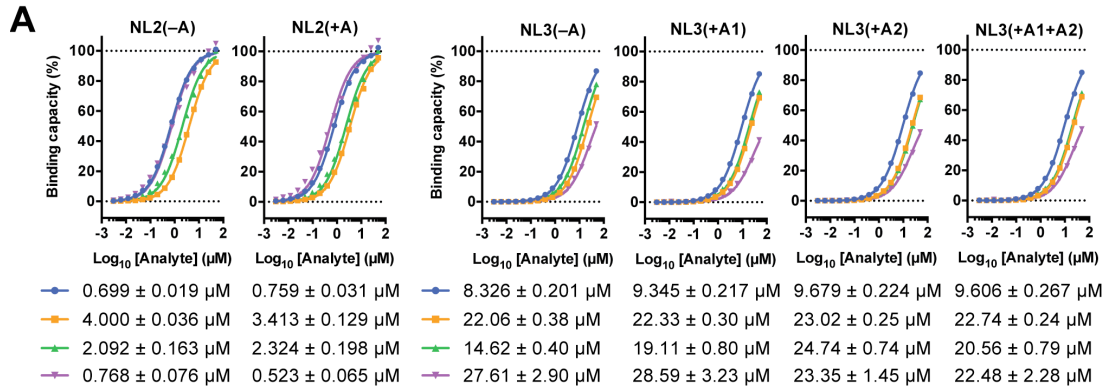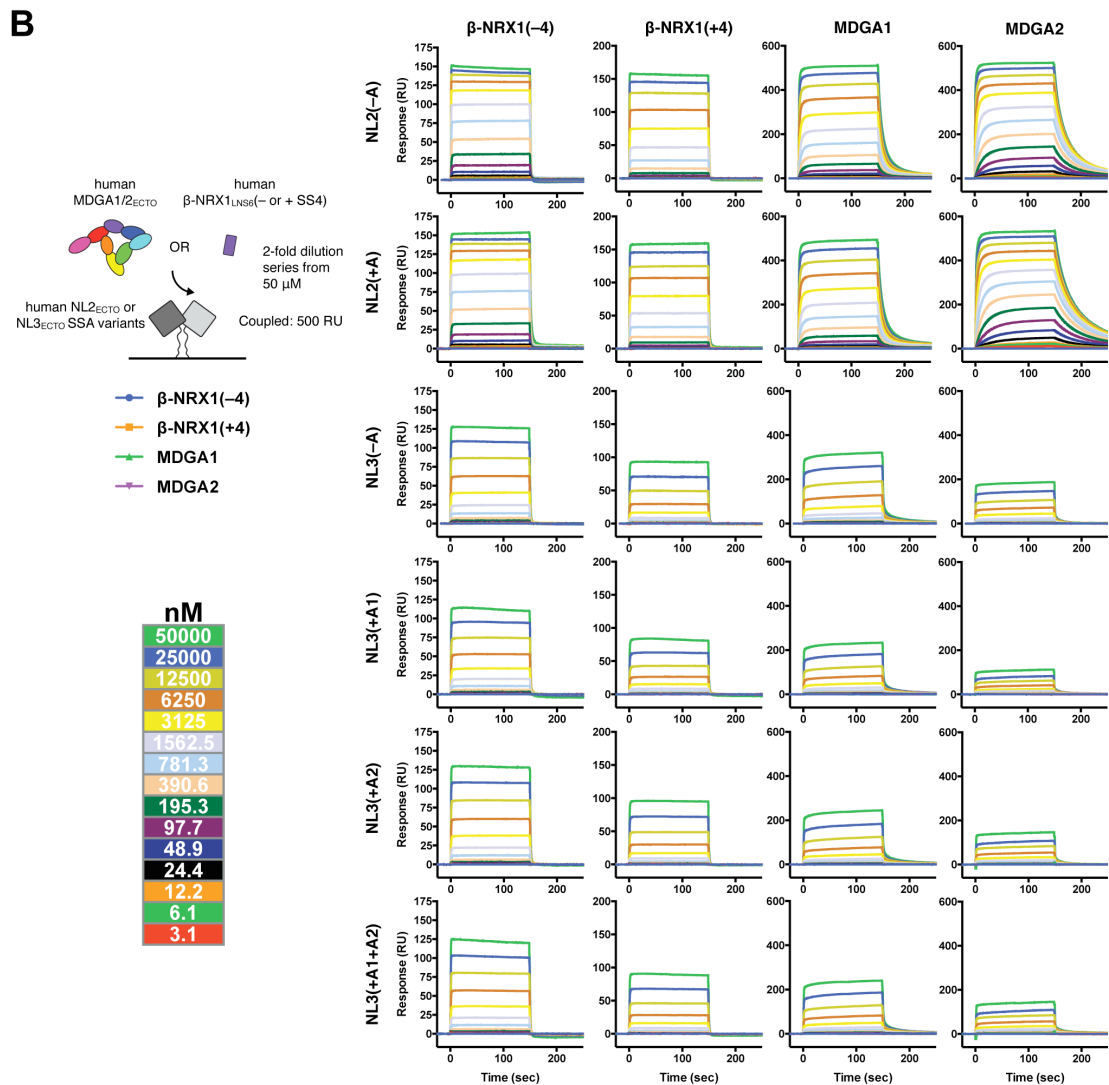

**Figure S10. NL2 or NL3 Spliced Sequences A (SSA) Do Not Modulate NL2/3–NRX or NL2/3–MDGA Interactions. Related to Figure 8.**

(A) Binding isotherms and summary of  $K_D$  values for the interaction of the human NL2(±A)<sub>ECTO</sub> or NL3(±A1±A2)<sub>ECTO</sub> cholinesterase domains with human β-NRX1<sub>LNS6</sub> lacking and containing

spliced sequence 4 ( $\beta$ -NRX1<sub>LNS6(-4)</sub> and  $\beta$ -NRX1<sub>LNS6(+4)</sub>, respectively), and with human MDGA1<sub>ECTO</sub> and MDGA2<sub>ECTO</sub>. Data for NL2(-A)<sub>ECTO</sub> and NL3(-A)<sub>ECTO</sub> have been repeated here from Figures 5A and S5A for clearer comparison.

**(B)** Schematic representation of the SPR setup and sensorgrams corresponding to (A).

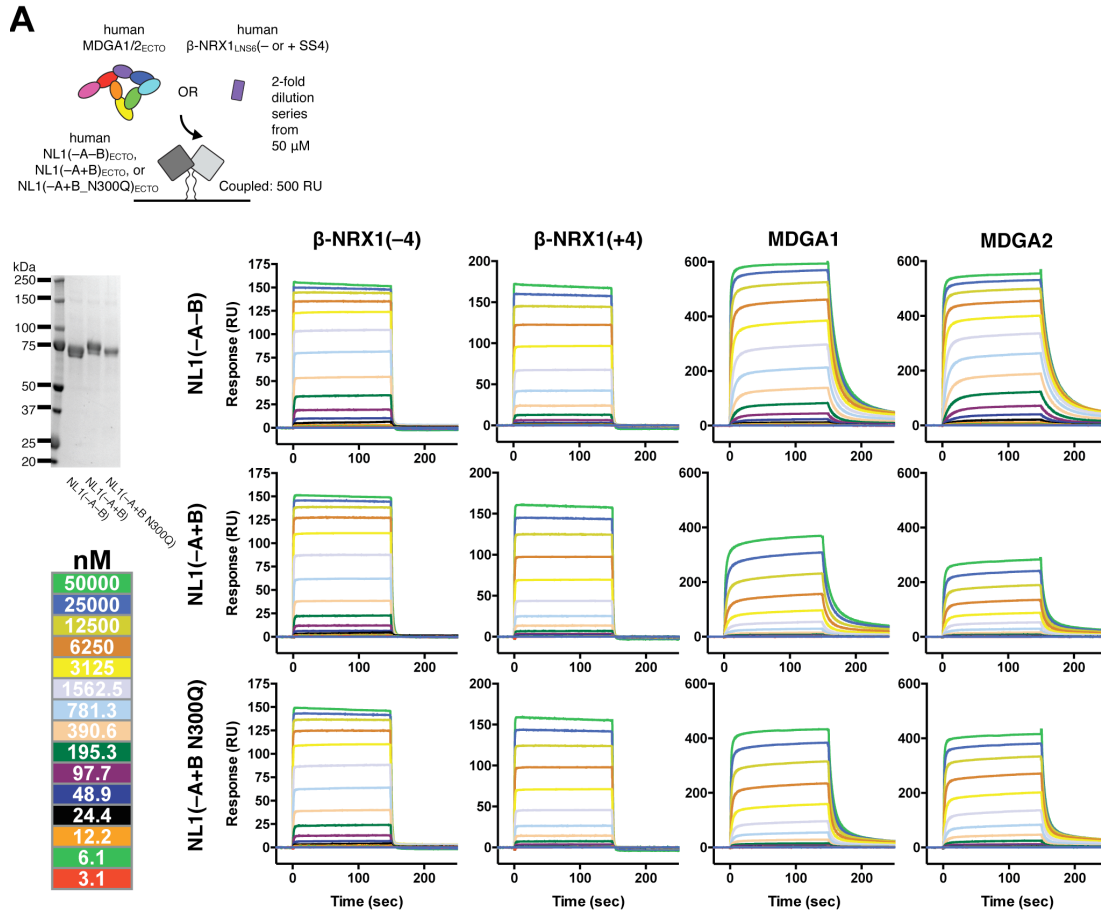

**Figure S11. NL1 Spliced Sequence B (SSB) Differentially Modulates NL1–NRX and NL1–MDGA Interactions. Related to Figure 8.**

(A) Schematic representation of the SPR setup, and sensorgrams for the interaction of human NL1(-A-B)<sub>ECTO</sub>, NL1(-A+B)<sub>ECTO</sub> and NL1(-A+B\_Asn300Gln)<sub>ECTO</sub> with human  $\beta$ -NRX1<sub>LNS6</sub> lacking and containing spliced sequence 4 ( $\beta$ -NRX1<sub>LNS6</sub>(-4) and  $\beta$ -NRX1<sub>LNS6</sub>(+4), respectively), and with human MDGA1<sub>ECTO</sub> and MDGA2<sub>ECTO</sub>. The SDS-PAGE gel shows NL1(-A-B)<sub>ECTO</sub>, NL1(-A+B)<sub>ECTO</sub> and NL1(-A+B\_Asn300Gln)<sub>ECTO</sub>, expressed in HEK 293T cells, indicating their relative differences in apparent molecular weight due to their different glycosylation states. Data for NL1(-A-B)<sub>ECTO</sub> have been repeated here from Figures 5A and S5A for clearer comparison. The corresponding binding isotherms and  $K_D$  values are presented in Figure 8C.



**Table S1. Crystallographic Data Collection and Refinement Statistics. Related to Figure 1, Figure 2, and Figure 8.**

|                                                                             | <b>hNL1<br/>(-A+B)<sub>ECTO</sub></b> | <b>cMDGA1<sub>ECTO</sub><br/>SeMet-labeled</b>  | <b>hNL1(-A-B)<sub>ECTO</sub>-<br/>cMDGA1<sub>ECTO</sub></b> |
|-----------------------------------------------------------------------------|---------------------------------------|-------------------------------------------------|-------------------------------------------------------------|
| PDB code                                                                    | 5OJK                                  | 5OJ2                                            | 5OJ6                                                        |
| <b>DATA COLLECTION</b>                                                      |                                       |                                                 |                                                             |
| Source                                                                      | DLS I24                               | DLS I03                                         | DLS I04-1                                                   |
| Wavelength $\lambda$ (Å)                                                    | 0.96860                               | 0.97938 (peak)                                  | 0.92000                                                     |
| No. of crystals                                                             | 1                                     | 1                                               | 1                                                           |
| Resolution (Å)                                                              | 51.70-2.55<br>(2.62-2.55)             | 96.65-3.20<br>(3.28-3.20)                       | 92.07-3.30<br>(3.39-3.30)                                   |
| Space group                                                                 | <i>P22<sub>1</sub>2<sub>1</sub></i>   | <i>P2<sub>1</sub>2<sub>1</sub>2<sub>1</sub></i> | <i>P2<sub>1</sub>2<sub>1</sub>2</i>                         |
| Cell dimensions; a, b, c (Å)                                                | 49.57, 118.05, 214.34                 | 103.18, 109.04, 208.77                          | 109.42, 184.14, 96.47                                       |
| Unique reflections                                                          | 40826 (3077)                          | 39616 (2874)                                    | 29576 (2080)                                                |
| Multiplicity                                                                | 7.5 (7.3)                             | 11.0 (10.9)                                     | 4.5 (4.6)                                                   |
| Completeness (%)                                                            | 97.3 (98.8)                           | 100.0 (99.8)                                    | 98.7 (95.4)                                                 |
| <i>R</i> <sub>MERGE</sub> (%)                                               | 17.9 (126.6)                          | 14.8 (134.8)                                    | 7.5 (84.0)                                                  |
| <i>R</i> <sub>MEAS</sub> (%)                                                | 19.3 (136.2)                          | 15.5 (141.5)                                    | 9.5 (106.3)                                                 |
| <i>R</i> <sub>PIM</sub> (%)                                                 | 6.8 (48.4)                            | 4.6 (42.3)                                      | 5.8 (64.1)                                                  |
| CC <sub>1/2</sub> (%)                                                       | 99.6 (54.1)                           | 99.8 (62.2)                                     | 99.9 (63.8)                                                 |
| CC* (%)                                                                     | 99.9 (83.8)                           | 99.9 (87.6)                                     | 99.9 (88.3)                                                 |
| Average <i>I</i> / $\sigma$ ( <i>I</i> )                                    | 8.4 (1.5)                             | 13.6 (1.8)                                      | 15.6 (1.6)                                                  |
| <b>REFINEMENT</b>                                                           |                                       |                                                 |                                                             |
| Resolution (Å)                                                              | 51.70-2.55<br>(2.61-2.55)             | 96.65-3.20<br>(3.24-3.20)                       | 72.38-3.30<br>(3.40-3.30)                                   |
| Reflections<br>(WORK / FREE set)                                            | 38734 / 2005                          | 35762 / 3851                                    | 28098 / 1474                                                |
| <i>R</i> <sub>WORK</sub> / <i>R</i> <sub>FREE</sub> (%)                     | 0.2360 / 0.2780<br>(0.3331 / 0.3658)  | 0.2144 / 0.2514<br>(0.3767 / 0.3808)            | 0.2269 / 0.2771<br>(0.3181 / 0.3838)                        |
| CC <sub>WORK</sub> / CC <sub>FREE</sub> in highest resolution shell (%)     | 0.732 / 0.629                         | 0.579 / 0.563                                   | 0.814 / 0.676                                               |
| No. of atoms<br>(NL1 / MDGA1 / NAG-BMA-MAN /<br>PGE / water)                | 8406 / 0 / 14 /<br>20 / 109           | 0 / 10788 / 299 /<br>0 / 0                      | 4278 / 5381 / 151 /<br>0 / 0                                |
| B factors (Å <sup>2</sup> )<br>(NL1 / MDGA1 / NAG-BMA-MAN /<br>PGE / water) | 50.8 / - / 71.3 /<br>52.9 / 44.6      | - / 105.2 / 146.7 /<br>- / -                    | 92.5 / 129.6 / 158.0 /<br>- / -                             |
| R.m.s.d. Bonds (Å)                                                          | 0.003                                 | 0.004                                           | 0.003                                                       |
| R.m.s.d. angles (°)                                                         | 0.782                                 | 0.986                                           | 0.939                                                       |
| <b>Ramachandran</b>                                                         |                                       |                                                 |                                                             |
| Favored (%)                                                                 | 94.79                                 | 92.37                                           | 92.78                                                       |
| Allowed (%)                                                                 | 5.21                                  | 7.56                                            | 7.14                                                        |
| Outliers (%)                                                                | 0.00                                  | 0.07                                            | 0.08                                                        |
| Molprobrity score / percentile                                              | 1.58 / 99th                           | 1.82 / 100th                                    | 1.99 / 100th                                                |

Numbers in parentheses refer to the highest resolution shell.

R.m.s.d.: root mean square deviation from ideal geometry.

$R_{PIM}$ : precision-indicating merging R-factor.

$R_{MEAS}$ : multiplicity-corrected  $R_{SYM}$ .

$CC_{1/2}$ ,  $CC^*$ : correlation coefficients between random half data sets.

$CC_{WORK}$  /  $CC_{FREE}$ : standard and cross-validated correlations of the experimental intensities with the intensities calculated from the refined molecular model.

NAG: N-Acetyl-D-Glucosamine.

BMA: Beta-D-mannose.

MAN: Alpha-D-mannose.

PGE: Triethylene glycol.

**Table S2. Mass Spectrometry Summary Data File. Related to Figure S5.**

Mass spectrometry summary data file for MDGA1 (two independent experiments), MDGA2 (two independent experiments), and MDGA1ΔIg1-3 (one experiment). Column headers containing spectra counts are highlighted in bold. Protein descriptions are listed in the far-right column. Data are sorted by MDGA1-Fc spectra count in descending order.

**Table S3. One-way Analysis of Variance of the Effect of Co-expression of NL with MDGA1 or MDGA2 at Low, Medium and High Plasmid Ratios. Related to Figure 5 and Figure 8.**

| ANOVA                          | F value         |         |                                | <i>p</i> value                             |
|--------------------------------|-----------------|---------|--------------------------------|--------------------------------------------|
| MDGA1 : NL1-4 low              | 9.87            |         |                                | < 0.0001                                   |
| Bonferroni post hoc comparison | Mean difference | t value | Significant at <i>p</i> < 0.05 | 95% confidence interval of mean difference |
| NL1(+B): CD4 vs. MDGA1         | 0.1009          | 0.4912  | No                             | -0.5770 to 0.7789                          |
| NL1(-B): CD4 vs. MDGA1         | 0.1761          | 0.8487  | No                             | -0.5085 to 0.8607                          |
| NL2: CD4 vs. MDGA1             | 1.526           | 6.791   | Yes                            | 0.7849 to 2.268                            |
| NL3: CD4 vs. MDGA1             | 0.9278          | 4.497   | Yes                            | 0.2471 to 1.608                            |
| NL4: CD4 vs. MDGA1             | 0.02018         | 0.0918  | No                             | -0.7054 to 0.7458                          |

| ANOVA                          | F value         |         |                                | <i>p</i> value                             |
|--------------------------------|-----------------|---------|--------------------------------|--------------------------------------------|
| MDGA1 : NL1-4 medium           | 15.18           |         |                                | < 0.0001                                   |
| Bonferroni post hoc comparison | Mean difference | t value | Significant at <i>p</i> < 0.05 | 95% confidence interval of mean difference |
| NL1(+B): CD4 vs. MDGA1         | 0.5515          | 1.892   | No                             | -0.4076 to 1.511                           |
| NL1(-B): CD4 vs. MDGA1         | 1.541           | 5.076   | Yes                            | 0.5423 to 2.540                            |
| NL2: CD4 vs. MDGA1             | 2.028           | 6.794   | Yes                            | 1.046 to 3.010                             |
| NL3: CD4 vs. MDGA1             | 1.484           | 4.861   | Yes                            | 0.4795 to 2.488                            |
| NL4: CD4 vs. MDGA1             | 0.6552          | 2.026   | No                             | -0.4087 to 1.719                           |

| ANOVA                          | F value         |         |                                | <i>p</i> value                             |
|--------------------------------|-----------------|---------|--------------------------------|--------------------------------------------|
| MDGA1 : NL1-4 high             | 31.63           |         |                                | < 0.0001                                   |
| Bonferroni post hoc comparison | Mean difference | t value | Significant at <i>p</i> < 0.05 | 95% confidence interval of mean difference |
| NL1(+B): CD4 vs. MDGA1         | 0.9434          | 4.373   | Yes                            | 0.2338 to 1.653                            |
| NL1(-B): CD4 vs. MDGA1         | 2.165           | 10.35   | Yes                            | 1.477 to 2.853                             |
| NL2: CD4 vs. MDGA1             | 1.856           | 8.241   | Yes                            | 1.115 to 2.596                             |
| NL3: CD4 vs. MDGA1             | 1.457           | 6.674   | Yes                            | 0.7390 to 2.175                            |
| NL4: CD4 vs. MDGA1             | 0.4879          | 2.106   | No                             | -0.2741 to 1.250                           |

| ANOVA                          | F value         |         |                                | <i>p</i> value                             |
|--------------------------------|-----------------|---------|--------------------------------|--------------------------------------------|
| MDGA2 : NL1-4 low              | 14.83           |         |                                | < 0.0001                                   |
| Bonferroni post hoc comparison | Mean difference | t value | Significant at <i>p</i> < 0.05 | 95% confidence interval of mean difference |
| NL1(+B): CD4 vs. MDGA2         | 0.7083          | 3.642   | Yes                            | 0.06660 to 1.350                           |

|                        |          |        |     |                   |
|------------------------|----------|--------|-----|-------------------|
| NL1(-B): CD4 vs. MDGA2 | 1.273    | 6.726  | Yes | 0.6488 to 1.898   |
| NL2: CD4 vs. MDGA2     | 1.653    | 7.840  | Yes | 0.9573 to 2.349   |
| NL3: CD4 vs. MDGA2     | 0.4456   | 2.302  | No  | -0.1929 to 1.084  |
| NL4: CD4 vs. MDGA2     | -0.06702 | 0.3139 | No  | -0.7716 to 0.6375 |

| ANOVA                          | F value         |         |                                | <i>p</i> value                             |
|--------------------------------|-----------------|---------|--------------------------------|--------------------------------------------|
| MDGA2 : NL1-4 medium           | 14.08           |         |                                | < 0.0001                                   |
| Bonferroni post hoc comparison | Mean difference | t value | Significant at <i>p</i> < 0.05 | 95% confidence interval of mean difference |
| NL1(+B): CD4 vs. MDGA2         | 1.031           | 3.334   | Yes                            | 0.01342 to 2.048                           |
| NL1(-B): CD4 vs. MDGA2         | 1.825           | 5.805   | Yes                            | 0.7903 to 2.859                            |
| NL2: CD4 vs. MDGA2             | 2.376           | 7.688   | Yes                            | 1.359 to 3.393                             |
| NL3: CD4 vs. MDGA2             | 0.7810          | 2.354   | No                             | -0.3110 to 1.873                           |
| NL4: CD4 vs. MDGA2             | 0.3797          | 1.125   | No                             | -0.7313 to 1.491                           |

| ANOVA                          | F value         |         |                                | <i>p</i> value                             |
|--------------------------------|-----------------|---------|--------------------------------|--------------------------------------------|
| MDGA2 : NL1-4 high             | 13.61           |         |                                | < 0.0001                                   |
| Bonferroni post hoc comparison | Mean difference | t value | Significant at <i>p</i> < 0.05 | 95% confidence interval of mean difference |
| NL1(+B): CD4 vs. MDGA2         | 0.8524          | 3.362   | Yes                            | 0.01736 to 1.687                           |
| NL1(-B): CD4 vs. MDGA2         | 0.9596          | 3.702   | Yes                            | 0.1059 to 1.813                            |
| NL2: CD4 vs. MDGA2             | 1.717           | 6.998   | Yes                            | 0.9088 to 2.524                            |
| NL3: CD4 vs. MDGA2             | 0.5741          | 2.304   | No                             | -0.2463 to 1.395                           |
| NL4: CD4 vs. MDGA2             | 0.6755          | 2.762   | No                             | -0.1299 to 1.481                           |

**Table S4. One-way Analysis of Variance of the Effect of NL(-B)  $\Delta$ Site I,  $\Delta$ Site II and  $\Delta$ Site I+II Mutant Co-expression with MDGA1 and MDGA2 at High Plasmid Ratio. Related to Figure 6.**

| ANOVA                                      | F value         |         |                           | p value                                    |
|--------------------------------------------|-----------------|---------|---------------------------|--------------------------------------------|
| MDGA : NL1(-B) $\Delta$ I $\Delta$ II high | 24.16           |         |                           | < 0.0001                                   |
| Bonferroni post hoc comparison             | Mean difference | t value | Significant at $p < 0.05$ | 95% confidence interval of mean difference |
| NL1(-B) WT: CD4 vs. MDGA1                  | 2.526           | 8.856   | Yes                       | 1.531 to 3.520                             |
| NL1(-B) $\Delta$ I: CD4 vs. MDGA1          | -0.1027         | 0.3800  | No                        | -1.045 to 0.8395                           |
| NL1(-B) $\Delta$ II: CD4 vs. MDGA1         | -0.5891         | 2.029   | No                        | -1.601 to 0.4232                           |
| NL1(-B) $\Delta$ I+II: CD4 vs. MDGA1       | -0.06621        | 0.2213  | No                        | -1.109 to 0.9770                           |
| NL1(-B) WT: CD4 vs. MDGA2                  | 2.217           | 7.486   | Yes                       | 1.184 to 3.250                             |
| NL1(-B) $\Delta$ I: CD4 vs. MDGA2          | -0.01825        | 0.06645 | No                        | -0.9757 to 0.9392                          |
| NL1(-B) $\Delta$ II: CD4 vs. MDGA2         | -0.7561         | 2.655   | No                        | -1.749 to 0.2369                           |
| NL1(-B) $\Delta$ I+II: CD4 vs. MDGA2       | 0.05128         | 0.1676  | No                        | -1.015 to 1.118                            |

**Table S5. One-way Analysis of Variance of the Effect of NL3 R451C Mutant Co-expression with MDGA1 and MDGA2 at Low Plasmid Ratio. Related to Figure 7.**

| ANOVA                          | F value         |         |                           | p value                                    |
|--------------------------------|-----------------|---------|---------------------------|--------------------------------------------|
| MDGA : NL3 low                 | 14.78           |         |                           | < 0.0001                                   |
| Bonferroni post hoc comparison | Mean difference | t value | Significant at $p < 0.05$ | 95% confidence interval of mean difference |
| NL3 WT: CD4 vs. MDGA1          | 1.077           | 4.845   | Yes                       | 0.3727 to 1.782                            |
| NL3 WT: CD4 vs. MDGA2          | -0.03604        | 0.1495  | No                        | -0.7999 to 0.7279                          |
| NL3 R451C: CD4 vs. MDGA1       | 0.2690          | 1.052   | No                        | -0.5415 to 1.079                           |
| NL3 R451C: CD4 vs. MDGA2       | 0.1859          | 0.6730  | No                        | -0.6895 to 1.061                           |
